# Supplementary material for: A Snapshot of the Trehalose Pathway During Seed Imbibition in Medicago truncatula Reveals Temporal- and Stress-Dependent Shifts in Gene Expression Patterns Associated With Metabolite Changes
Source: PubMed Central journal article supplement (PMC6930686; doi:10.3389/fpls.2019.01590), 2019-12-18
Supplement: Presentation_1.pdf [file Presentation_1.pdf]

## *Supplementary Material*

### **A Snapshot of the Trehalose Pathway during Seed Imbibition in *Medicago truncatula* Reveals Temporal- and Stress-Dependent Shifts in Gene Expression Patterns Associated with Metabolite Changes**

**Anca Macovei<sup>1,†</sup>, Andrea Pagano<sup>1,†,‡</sup>, Michela Cappuccio<sup>1,2</sup>, Lucia Gallotti<sup>3</sup>, Daniele Dondi<sup>3</sup>, Susana de Sousa Araújo<sup>2</sup>, Pedro Salema Fevereiro<sup>2</sup>, and Alma Balestrazzi<sup>1,\*</sup>**

<sup>1</sup>Country Department of Biology and Biotechnology 'L. Spallanzani', University of Pavia, Pavia, Italy

<sup>2</sup>Instituto De Tecnologia Química e Biológica ITQB-UNL António Xavier (ITQB-UNL), Oeiras, Portugal

<sup>3</sup>Department of Chemistry, University of Pavia, Pavia, Italy

**\* Correspondence:**

Alma Balestrazzi

[alma.balestrazzi@unipv.it](mailto:alma.balestrazzi@unipv.it)

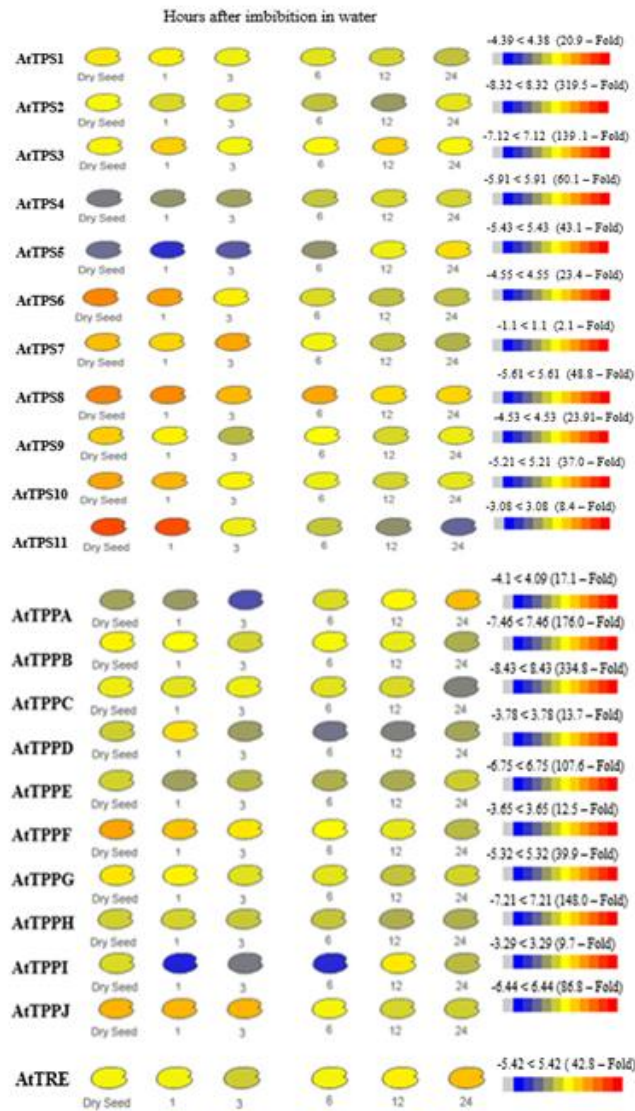

**Supplementary Figure 1.** Expression profiles of *A. thaliana* *AtTPS*, *AtTPP*, and *AtTRE* genes. Data is mined from AtGeneExpress microarray dataset and represented as pictographic image generated by Seed eFP Browser tool. Expression levels are represented by a color scale. The maximum expression level is indicated by the signal threshold above the color scale. The expression profiles of these genes were evaluated using the Seed eFP Browser tool (Winter et al., 2007; Bassel et al., 2008). In dry seeds, the most expressed isoforms are *AtTPS11*, *AtTPS8* and *AtTPS6*. The same profile is observed at 1 h of imbibition, adding a reduced expression of *AtTPS5*. At 3 h, the most expressed isoforms are *AtTPS7* and *AtTPS8*. At 6 h, *AtTPS8* shows the highest transcript level. As for the *TPP* gene family, *AtTPPF* and *AtTPPJ* are more expressed in dry seed while a relatively high expression is still visible at 1 h, 3 h and 6 h of imbibition. The expression level of *AtTPPI* appears reduced at 1 h and 6 h after imbibition with water. The *AtTRE* gene is slightly enhanced only after 24 h of imbibition.

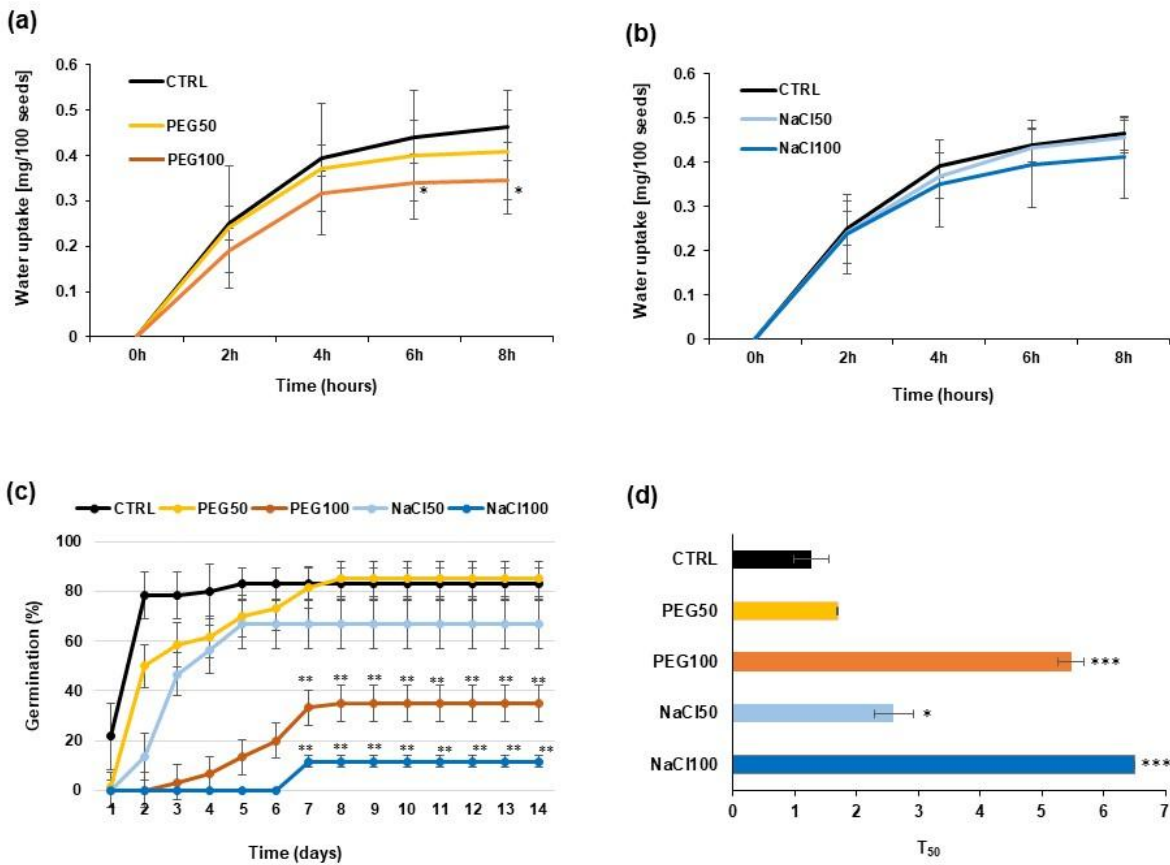

**Supplementary Figure 2.** Profiles of *M. truncatula* seed imbibition and germination under physiological and stress conditions. **(a)** Measurement of water uptake in control- (CTRL, water imbibition) and PEG-treated seeds. **(b)** Measurement of water uptake in control- and NaCl-treated seeds. **(c)** Percentage of seed germination. **(d)** The time necessary to reach 50% of germinated seeds ( $T_{50}$ ). Significant differences between treatments (PEG, NaCl) and control (water) were assessed based on the Student *t*-test (\* $p < 0.1$ ; \*\* $p < 0.05$ ; \*\*\* $p < 0.001$ ).

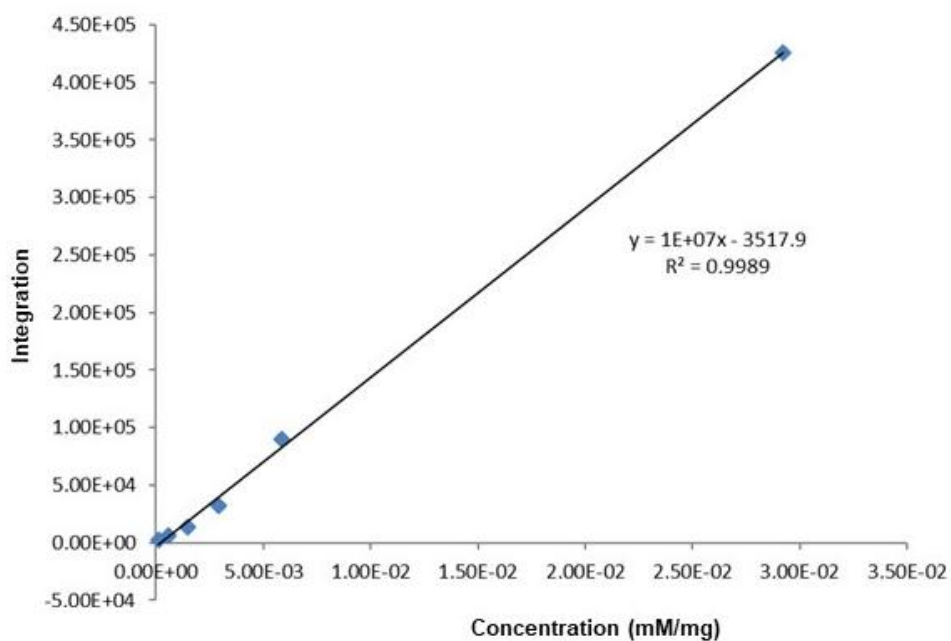

**Supplementary Figure 3.** Calibration curve used for the HPLC detection of trehalose content. The peaks of HPLC spectra were integrated and compared to the acquired trehalose standard signal. The concentration values were obtained on an average of three injections for each sample. The calibration curve was obtained for a concentration of trehalose in the range  $3 \times 10^{-2} - 1.5 \times 10^{-4}$  M ( $R^2=0.998$ ).

**Supplementary Table 1.** Oligonucleotide sequences used for the qRT-PCR reactions. For each primer pair, the PCR efficiency is given.

| <b>Gene</b>    | <b>Forward Primer (5'→3')</b> | <b>Reverse Primer (5'→3')</b> | <b>Efficiency</b> |
|----------------|-------------------------------|-------------------------------|-------------------|
| <i>MtACT</i>   | TCAATGTGCCTGCCATGTATGT        | ACTCACACCGTCACCAGAATCC        | 1.70              |
| <i>MtTPS1</i>  | GACTGCTCCACATCTCTGC           | GTCCGCACCTCACTGATCG           | 1.75              |
| <i>MtTPS2</i>  | CCAACAGGTCGTGATAGAACA         | AGAAGGTAGCGGGCACTT            | 1.85              |
| <i>MtTPS5</i>  | TGAAGGCACAAAGGAAAGAGGA        | CAGGCGACAGAGGAAGCAT           | 1.76              |
| <i>MtTPS6</i>  | TACCCACCCAATCAAATACA          | AGAGAAGAAACAGCAACCAAAC        | 1.75              |
| <i>MtTPS7</i>  | GGTGGTCTCCATCGCTAAGTG         | CATGCCGCAACTGCTTCT            | 1.69              |
| <i>MtTPS8</i>  | AGGAGTGATGGTTGGTATGTTGAGA     | CCGAGGGGAGTTGGAAGGAA          | 1.83              |
| <i>MtTPS9</i>  | TCAGGAAGCAAAGAAAGAAGCA        | CGAAACGAGGAACAGAGCGG          | 1.82              |
| <i>MtTPS10</i> | TAGGGGACGAGGGAAAGACG          | GGCAACAACATAGTAAGCAACT        | 1.83              |
| <i>MtTPS11</i> | TGCTGTGAGGGATGGGATGA          | GCTGAGTGAAGGCGAACAA           | 1.78              |
| <i>MtTPPA</i>  | ACGGAACTCTATTACGCTGGT         | CTTCTTGCCCTGCTTGTCTG          | 1.73              |
| <i>MtTPPB</i>  | GTAGAAGGGGTCAAGGGGT           | CTCCACCAATCGCCGCAA            | 1.83              |
| <i>MtTPPC</i>  | ACTCTTTCCATCCTTCTGCGTT        | GTCCTTCAATGTCACTCTCATCTT      | 1.88              |
| <i>MtTPPF</i>  | ATGAGGTCCGTAAGTTGCT           | GCGTTGAGCCACCAAATCC           | 1.84              |
| <i>MtTPPG</i>  | TCATCTTCCGCTCCACCG            | AGTTCCATCATAGTCCAAAAGC        | 1.83              |
| <i>MtTPPH</i>  | TCCAACAAGATTCACCGC            | GCCTTCATAGCATCCAACCA          | 1.78              |
| <i>MtTPPI</i>  | TGCCAGAGTTGAGAACCAC           | CCTTGCCCTTGTCCTTCAATTA        | 1.64              |
| <i>MtTRE</i>   | GGAGATAATAGGACTGCTGAACAC      | TGGTATTGCTGAGCCAGGAAT         | 1.78              |
| <i>MtSnRK1</i> | GGCGTCTTCTTCAATCATCGTCA       | GCATTCACATTTCCACCACCAG        | 1.81              |

**Supplementary Table 2.** List of *A. thaliana* and *M. truncatula* TPS (trehalose-6-phosphate synthase), TPP (trehalose-6-phosphate phosphatase) and TRE (trehalase) accessions. The percentage of similarity between *A. thaliana* and *M. truncatula* protein sequences is provided. Only the *M. truncatula* proteins with a similarity  $\geq 50\%$  with their *A. thaliana* orthologs were included. The orthologs presented complete protein domains have been selected for further analysis, hereby represented in bold.

| Name | <i>A. thaliana</i> accession | <i>M. truncatula</i> accession | Similarity (%) |
|------|------------------------------|--------------------------------|----------------|
| TPS1 | AT1G78580                    | <b>Medtr2g073260</b>           | 75.78          |
| TPS2 | AT1g16980                    | Medtr8g087910                  | 68.09          |
|      |                              | Medtr0034s0170                 | 64.87          |
|      |                              | Medtr2g073260                  | 64.77          |
|      |                              | <b>Medtr8g087930</b>           | 60.04          |
| TPS3 | AT1G17000                    | Medtr2g073260                  | 61.08          |
|      |                              | Medtr0034s0170                 | 62.16          |
| TPS4 | AT4G27550                    | Medtr2g073260                  | 63.18          |
|      |                              | Medtr0034s0170                 | 63.18          |
| TPS5 | AT4G17770                    | <b>Medtr1g109620</b>           | 77.40          |
|      |                              | Medtr8g105740                  | 72.16          |
|      |                              | Medtr1g032730                  | 71.31          |
|      |                              | Medtr8g063790                  | 64.08          |
|      |                              | Medtr4g080160                  | 63.21          |
|      |                              | Medtr4g129270                  | 56.63          |
|      |                              | Medtr3g078210                  | 52.25          |
|      |                              | Medtr3g467030                  | 50.43          |
| TPS6 | AT1G68020                    | <b>Medtr8g105740</b>           | 81.99          |
|      |                              | Medtr1g032730                  | 80.73          |
|      |                              | Medtr1g109620                  | 73.33          |
|      |                              | Medtr8g063790                  | 64.85          |
|      |                              | Medtr4g080160                  | 64.68          |
|      |                              | Medtr4g129270                  | 57.60          |
|      |                              | Medtr3g078210                  | 52.99          |
| TPS7 | AT1G06410                    | <b>Medtr4g080160</b>           | 77.65          |
|      |                              | Medtr4g129270                  | 56.14          |
| TPS8 | AT1G70290                    | Medtr8g063790                  | 73.24          |
|      |                              | Medtr8g105740                  | 63.89          |
|      |                              | Medtr1g032730                  | 62.59          |

|       |           |                      |       |
|-------|-----------|----------------------|-------|
|       |           | Medtr1g109620        | 62.03 |
|       |           | Medtr4g080160        | 60.31 |
|       |           | Medtr4g129270        | 58.29 |
|       |           | <b>Medtr3g078210</b> | 57.47 |
| TPS9  | AT1G23870 | <b>Medtr8g063790</b> | 75.32 |
|       |           | Medtr1g109620        | 63.85 |
|       |           | Medtr8g105740        | 63.74 |
|       |           | Medtr1g032730        | 63.40 |
|       |           | Medtr4g080160        | 59.48 |
|       |           | Medtr4g129270        | 59.04 |
| TPS10 | AT1G60140 | Medtr8g063790        | 72.40 |
|       |           | Medtr8g105740        | 62.56 |
|       |           | <b>Medtr1g032730</b> | 61.63 |
|       |           | Medtr1g109620        | 61.03 |
|       |           | Medtr4g080160        | 60.77 |
|       |           | Medtr4g129270        | 57.41 |
|       |           | Medtr3g078210        | 55.33 |
| TPS11 | AT2G18700 | <b>Medtr4g129270</b> | 63.40 |
|       |           | Medtr8g063790        | 60.12 |
|       |           | Medtr8g105740        | 59.16 |
|       |           | Medtr1g032730        | 58.06 |
|       |           | Medtr1g109620        | 57.75 |
|       |           | Medtr4g080160        | 56.41 |
|       |           | Medtr3g078210        | 51.93 |
| TPPA  | AT5G51460 | <b>Medtr4g036090</b> | 69.87 |
|       |           | Medtr3g008500        | 61.84 |
|       |           | Medtr4g101600        | 60.80 |
|       |           | Medtr4g036685        | 54.55 |
|       |           | Medtr8g090330        | 53.12 |
|       |           | Medtr3g074180        | 50.86 |
| TPPB  | AT1G78090 | <b>Medtr3g074180</b> | 62.99 |
|       |           | Medtr8g090330        | 62.57 |
|       |           | Medtr5g063080        | 60.93 |
|       |           | Medtr4g036090        | 51.54 |
|       |           | Medtr3g008500        | 50.56 |
| TPPC  | AT1G22210 | Medtr8g090330        | 62.74 |
|       |           | Medtr3g074180        | 61.89 |
|       |           | <b>Medtr5g063080</b> | 61.22 |

|      |           |                      |       |
|------|-----------|----------------------|-------|
|      |           | Medtr3g008500        | 53.65 |
|      |           | Medtr4g036090        | 53.16 |
|      |           | Medtr4g101600        | 50.79 |
| TPPD | AT1G35910 | Medtr5g063080        | 60.78 |
|      |           | Medtr3g074180        | 60.23 |
|      |           | Medtr4g036090        | 55.81 |
|      |           | Medtr3g008500        | 55.21 |
|      |           | Medtr4g101600        | 55.11 |
| TPPE | AT2G22190 | Medtr8g090330        | 65.14 |
|      |           | Medtr5g063080        | 60.86 |
|      |           | Medtr3g074180        | 60.35 |
|      |           | Medtr4g101600        | 55.29 |
|      |           | Medtr4g036090        | 54.46 |
|      |           | Medtr3g008500        | 52.94 |
|      |           | <b>Medtr8g027765</b> | 50.00 |
| TPPF | AT4G12430 | Medtr4g036090        | 65.47 |
|      |           | Medtr4g101600        | 64.64 |
|      |           | <b>Medtr3g008500</b> | 64.29 |
|      |           | Medtr4g036090        | 63.81 |
|      |           | Medtr8g090330        | 54.17 |
|      |           | Medtr4g036685        | 52.40 |
|      |           | Medtr3g074180        | 51.34 |
|      |           | Medtr5g063080        | 51.32 |
|      |           | Medtr8g027765        | 50.98 |
| TPPG | AT4G22590 | Medtr4g036090        | 65.51 |
|      |           | Medtr4g101600        | 63.27 |
|      |           | Medtr3g008500        | 62.73 |
|      |           | Medtr8g090330        | 52.45 |
|      |           | <b>Medtr4g036685</b> | 52.34 |
| TPPH | AT4G39770 | Medtr8g090330        | 68.60 |
|      |           | Medtr3g074180        | 61.61 |
|      |           | Medtr5g063080        | 60.93 |
|      |           | Medtr3g008500        | 56.50 |
|      |           | <b>Medtr4g101600</b> | 55.59 |
|      |           | Medtr4g036090        | 55.09 |
| TPPI | AT5G10100 | <b>Medtr8g090330</b> | 69.53 |
|      |           | Medtr3g074180        | 62.01 |



|      |           |                      |       |
|------|-----------|----------------------|-------|
|      |           | Medtr5g063080        | 58.24 |
|      |           | Medtr4g101600        | 52.23 |
|      |           | Medtr4g036090        | 51.27 |
|      |           | Medtr3g008500        | 50.00 |
| TPPJ | AT5G65140 | Medtr8g090330        | 72.08 |
|      |           | Medtr3g074180        | 62.11 |
|      |           | Medtr5g063080        | 59.10 |
|      |           | Medtr4g101600        | 54.65 |
| TRE  | AT4G24040 | <b>Medtr8g099985</b> | 58.44 |
